# Supplementary material
Source: PubMed Central journal article supplement (PMC3932613)
Supplement: NIHMS546626-supplement-Supp_Data.pdf [file NIHMS546626-supplement-Supp_Data.pdf]

Figure S1.

The resolution of the reconstructions was determined according to the 0.5 Fourier shell correlation criteria to 13 Å (A) for the small reconstruction, and to 17 Å for the large reconstruction (B).

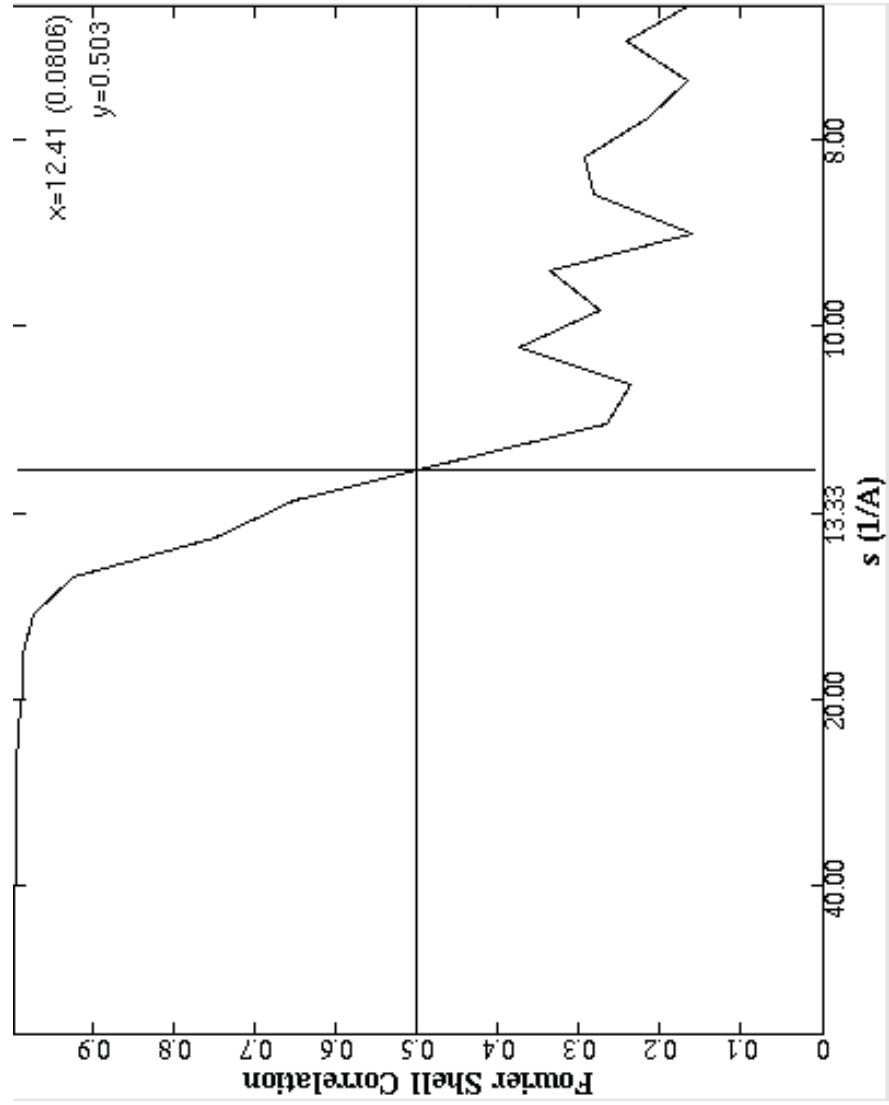

Figure S1A.

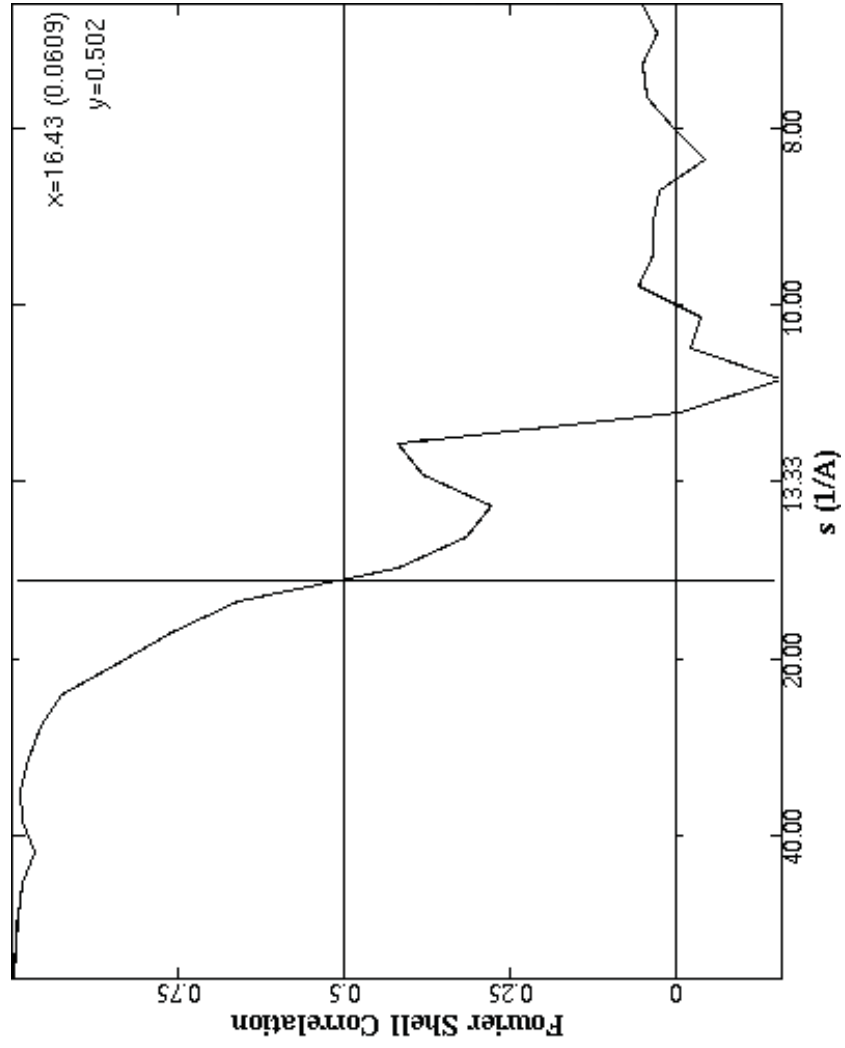

Figure S1B.
